# Supplementary material for: Prior Methamphetamine Use Disorder History Does Not Impair Interoceptive Processing of Soft Touch in HIV Infection
Source: MDPI journal article supplement (doi:10.3390/v13122476), 2021-12-10
Supplement: s1 [file s1]

**Supplemental Table S1.** Statistical comparisons were by means of fisher-exact tests for equality of proportions.

| <u>Characteristic</u>                        | <u>HIV-/METH-</u> | <u>HIV-/METH+</u> | <u>HIV+/METH-</u> | <u>HIV+/METH+</u> | <u>Statistic</u> |
|----------------------------------------------|-------------------|-------------------|-------------------|-------------------|------------------|
| <b><u>Lifetime Psychiatric Histories</u></b> |                   |                   |                   |                   |                  |
| <b><u>(n)</u></b>                            |                   |                   |                   |                   |                  |
| Antisocial Personality Disorder              | 1                 | 10                | 3                 | 3                 | FET, p<0.001     |
| Attention-deficit/hyperactivity disorder     | 1                 | 5                 | 2                 | 2                 | FET, p=0.13      |
| Major depressive disorder                    | 5                 | 9                 | 10                | 11                | FET, p=0.006     |
| <b><u>Substance Use Histories (n)</u></b>    |                   |                   |                   |                   |                  |
| Current Nicotine Use                         | 9                 | 11                | 7                 | 6                 | FET, p=0.33      |
| Alcohol (lifetime)                           | 12                | 16                | 5                 | 8                 | FET, p=0.002     |
| Cannabis (lifetime)                          | 7                 | 11                | 4                 | 4                 | FET, p=0.05      |
| Cocaine (lifetime)                           | 0                 | 8                 | 0                 | 3                 | FET, p<0.001     |
| Opiates (lifetime)                           | 0                 | 2                 | 0                 | 1                 | FET, p=0.11      |

**Supplemental Information: Prior Methamphetamine Use Disorder History Does Not Impair Interoceptive Processing of Soft Touch in HIV Infection**

Amanda Bischoff-Grethe, Ph.D., Ronald J. Ellis, M.D., Ph.D., Susan F. Tapert, Ph.D., Martin P. Paulus, M.D., Igor Grant, M.D., Translational Methamphetamine AIDS

Research Center (TMARC)

**Supplemental Table S2.** Significant BOLD activation for the Location (Palm, Forearm) + HIV x METH x Condition (Anticipation, Receipt) linear mixed effects whole brain analysis.

| Structure                | Volume | X   | Y   | Z   | F-value<br>(peak) | Post hoc comparisons        |         |         |      |
|--------------------------|--------|-----|-----|-----|-------------------|-----------------------------|---------|---------|------|
|                          |        |     |     |     |                   | Contrast                    | t ratio | p value | ES   |
| MAIN EFFECT OF LOCATION  |        |     |     |     |                   |                             |         |         |      |
| R Postcentral Gyrus      | 15093  | 38  | -20 | 48  | 72.79             |                             |         |         |      |
| L Culmen                 | 1323   | -22 | -48 | -24 | 21.28             |                             |         |         |      |
| MAIN EFFECT OF CONDITION |        |     |     |     |                   |                             |         |         |      |
| L Thalamus               | 744984 | -30 | -2  | -20 | 258.17            | Touch > Anticipation        | 15.33   | <.001   | 0.49 |
| R Middle Temporal Gyrus  | 13581  | 54  | -66 | 6   | 233.32            | Touch > Anticipation        | 15.06   | <.001   | 0.50 |
| METH x CONDITION         |        |     |     |     |                   |                             |         |         |      |
| L Parahippocampal Gyrus  | 94878  | -12 | -42 | -6  | 30.25             | METH-: Touch > Anticipation | 13.33   | <.001   | 0.61 |
|                          |        |     |     |     |                   | METH+: Touch > Anticipation | 5.02    | <.001   | 0.27 |
|                          |        |     |     |     |                   | Touch: METH- > METH+        | 4.57    | <.001   | 0.27 |
| L Cingulate Gyrus        | 12312  | -30 | 36  | 30  | 39.72             | METH-: Touch > Anticipation | 6.49    | <.001   | 0.32 |
|                          |        |     |     |     |                   | Touch: METH- > METH+        | 4.16    | <.001   | 0.26 |
| L Medial Frontal Gyrus   | 6939   | -10 | -8  | 72  | 31.03             | METH-: Touch > Anticipation | 4.30    | <.001   | 0.23 |
|                          |        |     |     |     |                   | Touch: METH- > METH+        | 3.63    | 0.001   | 0.29 |
| R Insula                 | 2646   | 32  | 22  | -6  | 26.53             | METH-: Touch > Anticipation | 11.11   | <.001   | 0.62 |
|                          |        |     |     |     |                   | METH+: Touch > Anticipation | 4.21    | <.001   | 0.27 |
|                          |        |     |     |     |                   | Touch: METH- > METH+        | 3.44    | 0.001   | 0.22 |
| R Precuneus              | 1647   | 6   | -72 | 18  | 24.88             | METH-: Touch > Anticipation | 6.90    | <.001   | 0.29 |
|                          |        |     |     |     |                   | Touch: METH- > METH+        | 3.40    | 0.002   | 0.24 |
| R Middle Frontal Gyrus   | 1215   | 42  | 46  | 22  | 24.66             | METH+: Anticipation > Touch | 3.07    | 0.01    | 0.20 |
|                          |        |     |     |     |                   | Touch: METH- > METH+        | 2.43    | 0.04    | 0.25 |
| L Middle Frontal Gyrus   | 1107   | -34 | -2  | 60  | 24.96             | METH-: Touch > Anticipation | 2.93    | 0.01    | 0.15 |
|                          |        |     |     |     |                   | Touch: METH- > METH+        | 2.83    | 0.01    | 0.19 |
| R Middle Frontal Gyrus   | 999    | 30  | 10  | 46  | 17.65             | Touch: METH- > METH+        | 3.06    | 0.01    | 0.19 |
| R Cingulate Gyrus        | 945    | 8   | -32 | 42  | 24.66             | METH-: Touch > Anticipation | 8.98    | <.001   | 0.44 |
|                          |        |     |     |     |                   | METH+: Touch > Anticipation | 2.44    | 0.02    | 0.14 |
|                          |        |     |     |     |                   | Touch: METH- > METH+        | 3.52    | 0.001   | 0.21 |
| L Insula                 | 891    | -28 | 24  | 12  | 18.06             | METH-: Touch > Anticipation | 8.30    | <.001   | 0.39 |

|  |  |  |  |  |  |                             |       |       |      |
|--|--|--|--|--|--|-----------------------------|-------|-------|------|
|  |  |  |  |  |  | METH+: Touch > Anticipation | 3.11  | 0.004 | 0.17 |
|  |  |  |  |  |  | METH-: Touch > Anticipation | 12.92 | <.001 | 0.79 |
|  |  |  |  |  |  | METH+: Touch > Anticipation | 5.57  | <.001 | 0.40 |
|  |  |  |  |  |  | Anticipation: METH+ > METH- | 2.24  | 0.03  | 0.19 |
|  |  |  |  |  |  | Touch: METH- > METH+        | 2.40  | 0.03  | 0.21 |
|  |  |  |  |  |  | n.s.                        |       |       |      |
|  |  |  |  |  |  | METH-: Touch > Anticipation | 3.37  | 0.004 | 0.18 |
|  |  |  |  |  |  | METH-: Touch > Anticipation | 10.97 | <.001 | 0.55 |
|  |  |  |  |  |  | METH+: Touch > Anticipation | 5.77  | <.001 | 0.33 |
|  |  |  |  |  |  | METH-: Touch > Anticipation | 10.64 | <.001 | 0.61 |
|  |  |  |  |  |  | METH+: Touch > Anticipation | 6.41  | <.001 | 0.42 |
|  |  |  |  |  |  | METH-: Touch > Anticipation | 9.38  | <.001 | 0.55 |
|  |  |  |  |  |  | METH-: Touch > Anticipation | 2.37  | 0.02  | 0.16 |
|  |  |  |  |  |  | Touch: METH- > METH+        | 4.12  | <.001 | 0.38 |
|  |  |  |  |  |  | n.s.                        |       |       |      |
|  |  |  |  |  |  | METH-: Touch > Anticipation | 9.19  | <.001 | 0.54 |
|  |  |  |  |  |  | METH+: Touch > Anticipation | 4.43  | <.001 | 0.30 |
|  |  |  |  |  |  | METH-: Touch > Anticipation | 11.80 | <.001 | 0.57 |
|  |  |  |  |  |  | METH+: Touch > Anticipation | 5.58  | <.001 | 0.31 |
|  |  |  |  |  |  | Anticipation: METH+ > METH- | 2.96  | 0.005 | 0.16 |
|  |  |  |  |  |  | METH+: Anticipation > Touch | 3.22  | 0.003 | 0.14 |
|  |  |  |  |  |  | Touch: METH- > METH+        | 3.56  | 0.003 | 0.19 |
|  |  |  |  |  |  | METH-: Touch > Anticipation | 7.73  | <.001 | 0.33 |
|  |  |  |  |  |  | METH+: Touch > Anticipation | 4.02  | <.001 | 0.20 |
|  |  |  |  |  |  | METH-: Touch > Anticipation | 12.49 | <.001 | 0.85 |
|  |  |  |  |  |  | METH+: Touch > Anticipation | 2.59  | 0.01  | 0.20 |
|  |  |  |  |  |  | Touch: METH- > METH+        | 5.24  | <.001 | 0.47 |
|  |  |  |  |  |  | METH+: Anticipation > Touch | 4.24  | <.001 | 0.35 |
|  |  |  |  |  |  | Touch: METH- > METH+        | 2.84  | 0.01  | 0.27 |
|  |  |  |  |  |  | METH-: Touch > Anticipation | 3.21  | 0.003 | 0.14 |
|  |  |  |  |  |  | METH+: Touch > Anticipation | 9.91  | <.001 | 0.52 |
|  |  |  |  |  |  | Touch: METH+ > METH-        | 2.81  | 0.008 | 0.26 |
|  |  |  |  |  |  | METH-: Touch > Anticipation | 13.24 | <.001 | 0.58 |
|  |  |  |  |  |  | METH+: Touch > Anticipation | 7.91  | <.001 | 0.40 |
|  |  |  |  |  |  | Touch: METH- > METH+        | 2.58  | 0.02  | 0.21 |
|  |  |  |  |  |  | METH-: Touch > Anticipation | 9.17  | <.001 | 0.51 |

|                                   |      |     |     |    |       |                                   |       |       |      |
|-----------------------------------|------|-----|-----|----|-------|-----------------------------------|-------|-------|------|
|                                   |      |     |     |    |       | METH+: Touch > Anticipation       | 3.71  | 0.001 | 0.24 |
|                                   |      |     |     |    |       | Touch: METH- > METH+              | 3.28  | 0.002 | 0.20 |
| <b>R Middle Frontal Gyrus</b>     | 324  | 44  | -2  | 52 | 20.82 | METH+: Anticipation > Touch       | 4.05  | <.001 | 0.24 |
| <b>R Middle Frontal Gyrus</b>     | 324  | 20  | -2  | 54 | 20.31 | METH-: Touch > Anticipation       | 3.22  | 0.006 | 0.13 |
|                                   |      |     |     |    |       | Touch: METH- > METH+              | 3.06  | 0.006 | 0.17 |
| <b>HIV x METH x CONDITION</b>     |      |     |     |    |       |                                   |       |       |      |
| <b>L Cuneus</b>                   | 9774 | -4  | -86 | 16 | 30.84 | HIV-, Touch: METH- > METH+        | 4.65  | <.001 | 0.39 |
|                                   |      |     |     |    |       | HIV-, METH-: Touch > Anticipation | 8.77  | <.001 | 0.45 |
|                                   |      |     |     |    |       | HIV+, METH-: Touch > Anticipation | 4.20  | <.001 | 0.26 |
|                                   |      |     |     |    |       | HIV+, METH+: Touch > Anticipation | 7.55  | <.001 | 0.52 |
|                                   |      |     |     |    |       | METH+, Touch: HIV+ > HIV-         | 4.29  | <.001 | 0.41 |
| <b>L Superior Temporal Gyrus</b>  | 3321 | -52 | -44 | 12 | 29.34 | HIV-, Touch: METH- > METH+        | 2.59  | 0.02  | 0.25 |
|                                   |      |     |     |    |       | HIV+, Touch: METH+ > METH-        | 3.80  | <.001 | 0.41 |
|                                   |      |     |     |    |       | HIV-, METH-: Touch > Anticipation | 8.23  | <.001 | 0.45 |
|                                   |      |     |     |    |       | HIV+, METH-: Touch > Anticipation | 3.92  | <.001 | 0.25 |
|                                   |      |     |     |    |       | HIV+, METH+: Touch > Anticipation | 10.55 | <.001 | 0.76 |
|                                   |      |     |     |    |       | METH+, Touch: HIV+ > HIV-         | 4.94  | <.001 | 0.54 |
| <b>R Cingulate Gyrus</b>          | 2322 | 6   | 16  | 40 | 26.7  | HIV-, Touch: METH- > METH+        | 4.47  | <.001 | 0.37 |
|                                   |      |     |     |    |       | HIV+, Touch: METH+ > METH-        | 2.39  | 0.04  | 0.22 |
|                                   |      |     |     |    |       | HIV-, METH-: Touch > Anticipation | 5.70  | <.001 | 0.37 |
|                                   |      |     |     |    |       | HIV+, METH+: Touch > Anticipation | 4.72  | <.001 | 0.41 |
|                                   |      |     |     |    |       | METH+, Anticipation: HIV- > HIV+  | 2.27  | 0.04  | 0.22 |
|                                   |      |     |     |    |       | METH-, Touch: HIV- > HIV+         | 2.98  | 0.009 | 0.25 |
|                                   |      |     |     |    |       | METH+, Touch: HIV+ > HIV-         | 3.70  | 0.001 | 0.35 |
| <b>L Inferior Parietal Lobule</b> | 1863 | -40 | -56 | 48 | 24.48 | HIV-, Touch: METH- > METH+        | 3.53  | 0.003 | 0.30 |
|                                   |      |     |     |    |       | HIV-, METH-: Touch > Anticipation | 4.84  | <.001 | 0.27 |
|                                   |      |     |     |    |       | HIV-, METH+: Anticipation > Touch | 2.35  | 0.05  | 0.16 |
|                                   |      |     |     |    |       | HIV+, METH+: Touch > Anticipation | 4.70  | <.001 | 0.35 |
|                                   |      |     |     |    |       | METH+, Touch: HIV+ > HIV-         | 3.39  | 0.003 | 0.16 |
| <b>L Middle Frontal Gyrus</b>     | 1809 | -30 | 36  | 30 | 28.49 | HIV-, Touch: METH- > METH+        | 5.20  | <.001 | 0.44 |
|                                   |      |     |     |    |       | HIV+, Touch: METH+ > METH-        | 2.35  | 0.04  | 0.22 |
|                                   |      |     |     |    |       | HIV-, METH-: Touch > Anticipation | 6.57  | <.001 | 0.39 |
|                                   |      |     |     |    |       | HIV+, METH+: Touch > Anticipation | 5.67  | <.001 | 0.44 |
|                                   |      |     |     |    |       | METH-, Touch: HIV- > HIV+         | 2.38  | 0.04  | 0.20 |
|                                   |      |     |     |    |       | METH+, Touch: HIV+ > HIV-         | 4.83  | <.001 | 0.47 |

|                               |      |     |     |     |       |                                   |       |       |      |
|-------------------------------|------|-----|-----|-----|-------|-----------------------------------|-------|-------|------|
| <b>R Cuneus</b>               | 1053 | 12  | -90 | 6   | 21.4  | HIV+, Touch: METH+ > METH-        | 2.73  | 0.02  | 0.33 |
|                               |      |     |     |     |       | HIV-, METH+: Anticipation > Touch | 3.84  | <.001 | 0.24 |
|                               |      |     |     |     |       | HIV+, METH+: Touch > Anticipation | 4.03  | <.001 | 0.27 |
|                               |      |     |     |     |       | METH+, Touch: HIV+ > HIV-         | 2.90  | 0.02  | 0.35 |
| <b>L Fusiform Gyrus</b>       | 918  | -42 | -56 | -6  | 24.15 | HIV-, Anticipation: METH+ > METH- | 2.83  | 0.01  | 0.26 |
|                               |      |     |     |     |       | HIV-, Touch: METH- > METH+        | 2.77  | 0.01  | 0.26 |
|                               |      |     |     |     |       | HIV-, METH-: Touch > Anticipation | 9.14  | <.001 | 0.59 |
|                               |      |     |     |     |       | HIV+, METH-: Touch > Anticipation | 4.65  | <.001 | 0.35 |
|                               |      |     |     |     |       | HIV+, METH+: Touch > Anticipation | 8.32  | <.001 | 0.71 |
|                               |      |     |     |     |       | METH+, Anticipation: HIV- > HIV+  | 3.15  | 0.007 | 0.33 |
|                               |      |     |     |     |       | METH+, Touch: HIV+ > HIV-         | 2.90  | 0.01  | 0.30 |
| <b>L Culmen</b>               | 783  | -6  | -36 | -24 | 18.86 | HIV-, Touch: METH- > METH+        | 5.92  | <.001 | 0.60 |
|                               |      |     |     |     |       | HIV-, METH-: Touch > Anticipation | 7.90  | <.001 | 0.65 |
|                               |      |     |     |     |       | HIV+, METH-: Touch > Anticipation | 4.22  | <.001 | 0.41 |
|                               |      |     |     |     |       | HIV+, METH+: Touch > Anticipation | 5.57  | <.001 | 0.61 |
|                               |      |     |     |     |       | METH+, Touch: HIV+ > HIV-         | 4.16  | <.001 | 0.48 |
| <b>R Posterior Cingulate</b>  | 702  | 18  | -66 | 6   | 22.01 | HIV-, Touch: METH- > METH+        | 3.26  | 0.007 | 0.35 |
|                               |      |     |     |     |       | HIV-, METH-: Touch > Anticipation | 5.73  | <.001 | 0.32 |
|                               |      |     |     |     |       | HIV+, METH+: Touch > Anticipation | 5.11  | <.001 | 0.38 |
| <b>L Medial Frontal Gyrus</b> | 702  | 0   | -12 | 76  | 25.34 | n.s.                              |       |       | 0.00 |
| <b>L Precentral Gyrus</b>     | 621  | -48 | 10  | 0   | 21.74 | HIV-, Touch: METH- > METH+        | 3.14  | 0.007 | 0.28 |
|                               |      |     |     |     |       | HIV-, METH-: Touch > Anticipation | 9.61  | <.001 | 0.63 |
|                               |      |     |     |     |       | HIV+, METH-: Touch > Anticipation | 5.52  | <.001 | 0.43 |
|                               |      |     |     |     |       | HIV-, METH+: Touch > Anticipation | 2.46  | 0.02  | 0.20 |
|                               |      |     |     |     |       | HIV+, METH+: Touch > Anticipation | 8.74  | <.001 | 0.76 |
|                               |      |     |     |     |       | METH+, Anticipation: HIV- > HIV+  | 2.96  | 0.01  | 0.30 |
|                               |      |     |     |     |       | METH+, Touch: HIV+ > HIV-         | 2.61  | 0.02  | 0.26 |
| <b>R Postcentral Gyrus</b>    | 594  | 60  | -18 | 16  | 19.33 | HIV-, Touch: METH- > METH+        | 4.00  | <.001 | 0.46 |
|                               |      |     |     |     |       | HIV+, Touch: METH+ > METH-        | 2.91  | 0.009 | 0.37 |
|                               |      |     |     |     |       | HIV-, METH-: Touch > Anticipation | 8.70  | <.001 | 0.60 |
|                               |      |     |     |     |       | HIV+, METH-: Touch > Anticipation | 6.10  | <.001 | 0.49 |
|                               |      |     |     |     |       | HIV-, METH+: Touch > Anticipation | 2.71  | 0.01  | 0.23 |
|                               |      |     |     |     |       | HIV+, METH+: Touch > Anticipation | 10.34 | <.001 | 0.94 |
|                               |      |     |     |     |       | METH+, Touch: HIV+ > HIV-         | 5.27  | <.001 | 0.69 |
| <b>L Declive</b>              | 567  | -22 | -60 | -18 | 20.78 | HIV-, Touch: METH- > METH+        | 3.38  | 0.003 | 0.35 |
|                               |      |     |     |     |       | HIV-, METH-: Touch > Anticipation | 9.59  | <.001 | 0.63 |

|                                |     |     |     |     |       |                                   |      |       |      |
|--------------------------------|-----|-----|-----|-----|-------|-----------------------------------|------|-------|------|
|                                |     |     |     |     |       | HIV+, METH-: Touch > Anticipation | 6.83 | <.001 | 0.53 |
|                                |     |     |     |     |       | HIV+, METH+: Touch > Anticipation | 8.01 | <.001 | 0.69 |
|                                |     |     |     |     |       | METH+, Anticipation: HIV- > HIV+  | 2.74 | 0.02  | 0.33 |
|                                |     |     |     |     |       | METH+, Touch: HIV+ > HIV-         | 2.49 | 0.03  | 0.30 |
| <b>L Middle Temporal Gyrus</b> | 540 | -46 | -18 | -14 | 17.5  | HIV-, Anticipation: METH+ > METH- | 3.20 | 0.005 | 0.29 |
|                                |     |     |     |     |       | HIV-, Touch: METH- > METH+        | 2.28 | 0.04  | 0.20 |
|                                |     |     |     |     |       | HIV-, METH-: Touch > Anticipation | 8.37 | <.001 | 0.56 |
|                                |     |     |     |     |       | HIV+, METH-: Touch > Anticipation | 4.08 | <.001 | 0.32 |
|                                |     |     |     |     |       | HIV+, METH+: Touch > Anticipation | 7.90 | <.001 | 0.69 |
|                                |     |     |     |     |       | METH+, Anticipation: HIV- > HIV+  | 2.81 | 0.01  | 0.41 |
|                                |     |     |     |     |       | METH+, Touch: HIV+ > HIV-         | 3.34 | 0.004 | 0.34 |
| <b>L Postcentral Gyrus</b>     | 513 | -48 | -30 | 34  | 21.28 | HIV-, Touch: METH- > METH+        | 2.97 | 0.009 | 0.25 |
|                                |     |     |     |     |       | HIV-, METH-: Touch > Anticipation | 7.06 | <.001 | 0.37 |
|                                |     |     |     |     |       | HIV+, METH-: Touch > Anticipation | 4.54 | <.001 | 0.28 |
|                                |     |     |     |     |       | HIV+, METH+: Touch > Anticipation | 7.44 | <.001 | 0.52 |
|                                |     |     |     |     |       | METH+, Touch: HIV+ > HIV-         | 3.37 | 0.004 | 0.32 |
| <b>R Medial Frontal Gyrus</b>  | 486 | 26  | 48  | 16  | 15.52 | HIV-, Touch: METH- > METH+        | 3.03 | 0.01  | 0.23 |
|                                |     |     |     |     |       | HIV-, METH-: Touch > Anticipation | 5.72 | <.001 | 0.35 |
|                                |     |     |     |     |       | HIV+, METH+: Touch > Anticipation | 4.39 | <.001 | 0.36 |
|                                |     |     |     |     |       | METH-, Touch: HIV- > HIV+         | 2.88 | 0.02  | 0.21 |
| <b>R Parahippocampal Gyrus</b> | 405 | 8   | -44 | -2  | 26.12 | HIV-, Touch: METH- > METH+        | 4.77 | <.001 | 0.54 |
|                                |     |     |     |     |       | HIV-, METH-: Touch > Anticipation | 6.53 | <.001 | 0.46 |
|                                |     |     |     |     |       | HIV+, METH-: Touch > Anticipation | 2.57 | 0.03  | 0.22 |
|                                |     |     |     |     |       | HIV+, METH+: Touch > Anticipation | 5.60 | <.001 | 0.53 |
|                                |     |     |     |     |       | METH+, Touch: HIV+ > HIV-         | 3.74 | 0.001 | 0.49 |
| <b>R Precentral Gyrus</b>      | 351 | 56  | 6   | 12  | 22.00 | HIV-, Touch: METH- > METH+        | 3.34 | 0.004 | 0.32 |
|                                |     |     |     |     |       | HIV-, METH-: Touch > Anticipation | 6.07 | <.001 | 0.34 |
|                                |     |     |     |     |       | HIV+, METH+: Touch > Anticipation | 4.83 | <.001 | 0.36 |
|                                |     |     |     |     |       | METH+, Touch: HIV+ > HIV-         | 3.35 | 0.004 | 0.37 |
| <b>R Supramarginal Gyrus</b>   | 351 | 44  | -48 | 34  | 20.63 | HIV+, Touch: METH+ > METH-        | 3.50 | 0.005 | 0.32 |
|                                |     |     |     |     |       | HIV-, METH-: Touch > Anticipation | 2.97 | 0.01  | 0.16 |
|                                |     |     |     |     |       | HIV+, METH+: Touch > Anticipation | 5.11 | <.001 | 0.38 |
|                                |     |     |     |     |       | METH-, Touch: HIV- > HIV+         | 2.62 | 0.03  | 0.21 |
|                                |     |     |     |     |       | METH+, Touch: HIV+ > HIV-         | 2.95 | 0.01  | 0.27 |
| <b>L Insula</b>                | 324 | -36 | 0   | 16  | 19.25 | HIV-, Anticipation: METH+ > METH- | 3.09 | 0.005 | 0.24 |
|                                |     |     |     |     |       | HIV-, Touch: METH- > METH+        | 3.59 | 0.001 | 0.28 |
